# Supplementary material for: Tin(ii) fluoride vs. tin(ii) chloride – a comparison of their coordination chemistry with neutral ligands
Source: Royal Society of Chemistry journal article supplement (doi:10.1039/c3dt50743b), 2013-01-01
Supplement: c3dt50743b.pdf [file c3dt50743b.pdf]

**ESI**

**Tin(II) fluoride vs. tin(II) chloride – a comparison of their coordination chemistry with neutral ligands**

Chitra Gurnani, Andrew L. Hector, Edward J. Jager, William Levason, David Pugh and Gillian Reid

**SUPPLEMENTARY INFORMATION**

Table S1 Crystal data and structure refinement details

|                               |                                                                                      |                                                                                                                                 |                                                                                                             |
|-------------------------------|--------------------------------------------------------------------------------------|---------------------------------------------------------------------------------------------------------------------------------|-------------------------------------------------------------------------------------------------------------|
| Compound                      | [CH <sub>2</sub> (PMe <sub>3</sub> ) <sub>2</sub> ][SnCl <sub>3</sub> ] <sub>2</sub> | [( <i>o</i> -C <sub>6</sub> H <sub>4</sub> (PMe <sub>2</sub> ) <sub>2</sub> CH <sub>2</sub> ) <sub>2</sub> ] <sub>2</sub> .dmso | [Ph <sub>2</sub> P(H)(CH <sub>2</sub> ) <sub>2</sub> P(H)Ph <sub>2</sub> ][SnCl <sub>3</sub> ] <sub>2</sub> |
| Formula                       | C <sub>7</sub> H <sub>20</sub> Cl <sub>6</sub> P <sub>2</sub> Sn <sub>2</sub>        | C <sub>11</sub> H <sub>18</sub> I <sub>2</sub> P <sub>2</sub> .Me <sub>2</sub> SO                                               | C <sub>26</sub> H <sub>26</sub> Cl <sub>6</sub> P <sub>2</sub> Sn <sub>2</sub>                              |
| <i>M</i> /g mol <sup>-1</sup> | 616.25                                                                               | 544.12                                                                                                                          | 850.49                                                                                                      |
| Crystal system                | monoclinic                                                                           | monoclinic                                                                                                                      | monoclinic                                                                                                  |
| Space group (No.)             | P2 <sub>1</sub> /c (14)                                                              | P2 <sub>1</sub> /c (14)                                                                                                         | P2 <sub>1</sub> /c (14)                                                                                     |
| <i>a</i> /Å                   | 8.793(3)                                                                             | 9.035(2)                                                                                                                        | 11.407(5)                                                                                                   |
| <i>b</i> /Å                   | 20.570(6)                                                                            | 20.046(5)                                                                                                                       | 16.501(6)                                                                                                   |
| <i>c</i> /Å                   | 10.823(4)                                                                            | 11.377(3)                                                                                                                       | 9.233(4)                                                                                                    |
| <i>α</i> /°                   | 90                                                                                   | 90                                                                                                                              | 90                                                                                                          |
| <i>β</i> /°                   | 104.374(4)                                                                           | 95.021(4)                                                                                                                       | 113.011(6)                                                                                                  |
| <i>γ</i> /°                   | 90                                                                                   | 90                                                                                                                              | 90                                                                                                          |
| <i>U</i> /Å <sup>3</sup>      | 1896.4(11)                                                                           | 2052.6(9)                                                                                                                       | 1599.6(11)                                                                                                  |

|                                           |       |   |       |       |
|-------------------------------------------|-------|---|-------|-------|
| Z                                         | 4     | 4 | 4     | 2     |
| $\mu(\text{Mo-K}\alpha) / \text{mm}^{-1}$ | 3.628 |   | 3.315 | 2.178 |
| $F(000)$                                  | 1176  |   | 1048  | 828   |
| Total reflections                         | 11751 |   | 9685  | 9358  |
| Unique reflections                        | 4304  |   | 4638  | 3635  |
| $R_{\text{int}}$                          | 0.062 |   | 0.027 | 0.046 |
| Goodness-of-fit on $F^2$                  | 0.991 |   | 0.954 | 1.137 |
| $R_1^b [I_o > 2\sigma(I_o)]$              | 0.046 |   | 0.020 | 0.056 |
| $R_1$ (all data)                          | 0.064 |   | 0.023 | 0.066 |
| $wR_2^b [I_o > 2\sigma(I_o)]$             | 0.079 |   | 0.043 | 0.082 |
| $wR_2$ (all data)                         | 0.087 |   | 0.043 | 0.086 |



Positional disorder was observed for the phosphonium cations based around P1 and P4; the use of DFIX was necessary to restrain the P–C bonds to a sensible length. A second dataset of the same compound was obtained with the *c* axis of the unit cell  $\sim 1/3^{\text{rd}}$  of the length (hence the cell volume was also  $\sim 1/3^{\text{rd}}$  of the size and *Z* = 8). However, there were clear (albeit weak) reflections which corresponded to the longer axis hence the larger cell was determined as correct.

### 1,1,3,3-tetramethylbenzodiphospho-1,3-diiium diiodide

Diiodomethane (0.268 g, 1.0 mmol) was added to a solution of diphos (0.198 g, 1.0 mmol) in PhMe (20 mL) and refluxed for 16 h. A white precipitate formed which, upon cooling, was allowed to settle. The solid was isolated by decanting away the supernatant and drying *in vacuo*. Yield 0.440 g, 95%. Required for for  $\text{C}_{11}\text{H}_{18}\text{I}_2\text{P}_2$  (465.9): C, 28.3; H, 3.9. Found: C, 28.8; H, 4.0%.  $^1\text{H}$  NMR( $\text{d}^6$ -dmsO, 295 K): 2.56 (d,  $J_{\text{HP}}$  = 16.1 Hz, [12H]), 3.93 (t,  $J_{\text{HP}}$  = 13.7 Hz, [2H]), 8.17–8.25 (m, [2H]), 8.51–8.60 (m, [2H]).  $^{13}\text{C}$ { $^1\text{H}$ } NMR ( $\text{d}^6$ -dmsO 295 K): 11.42 (d,  $J_{\text{CP}}$  = 50.8 Hz), 100.40 (s), 129.63 (s), 131.90 (t,  $J_{\text{CP}}$  = 10.7 Hz), 135.81 (d,  $J_{\text{CP}}$  = 6.8 Hz).  $^{31}\text{P}$ { $^1\text{H}$ } NMR ( $\text{d}^6$ -dmsO, 295 K): 50.4.

The structure is shown in Fig S2.

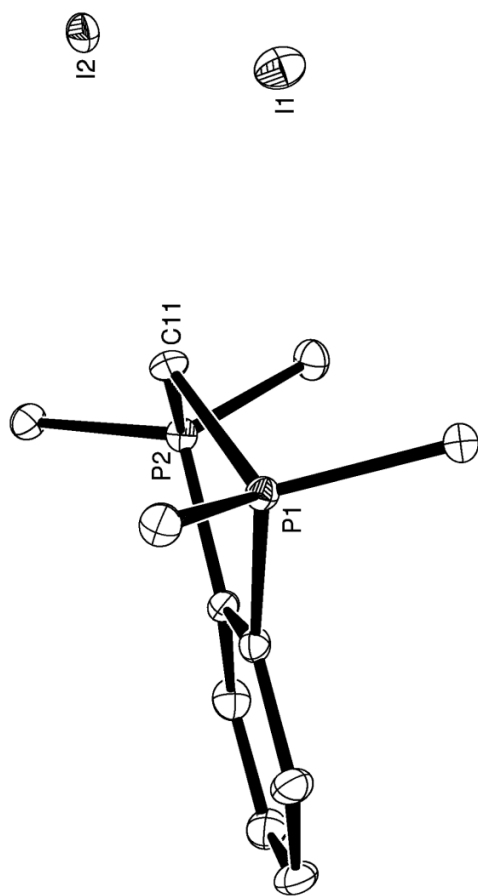

Figure S2. Crystal structure of  $[o\text{-C}_6\text{H}_4(\text{PMe}_2)_2(\text{CH}_2)]\text{I}_2 \cdot \text{Me}_2\text{SO}$  showing the atom numbering scheme. Ellipsoids are drawn at the 50% probability level and H atoms and the dmsolvent molecule are omitted for clarity. Selected bond lengths (Å) and angles (°): P1–C11 = 1.8073(19), P2–C11 = 1.8130(19); P1–C11–P2 = 107.62(11).

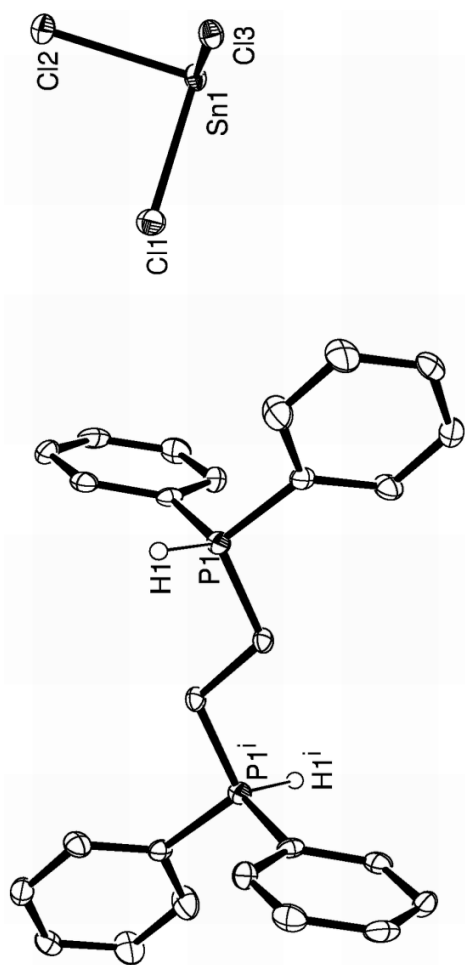

Figure S3 The structure of  $[\text{Ph}_2\text{P}(\text{H})(\text{CH}_2)_2\text{P}(\text{H})\text{Ph}_2][\text{SnCl}_3]_2$  showing the cation and one anion. Ellipsoids are drawn at the 50% probability level and H atoms (bar PH) are omitted for clarity. Symmetry code 2-x, 1-y, 2-z Selected bond lengths (Å) and angles (°): P1-H1 = 1.37(5), Cl1-Sn1 = 2.5061(15) Cl2-Sn1 = 2.5064(16), Cl3-Sn1 = 2.5457(15), Cl1-Sn1-Cl2 = 91.28(5), Cl1-Sn1-Cl3 = 90.27(5), Cl2-Sn1-Cl3 = 90.68(4).
